# Supplementary material
Source: publisher figshare collection journal article supplement (https://frontiersin.figshare.com/ndownloader/files/13891730)

**Supplemental Figure 3. Day-to-day variability of cytotoxic ECFCs responses to the selected set of toxicants.** The X-axis shows concentration of toxicants on log scale (as indicated in Methods). The Y-axis shows estimated coefficient function from the model for the comparison of day 2 vs. day 1 (A) and day 3 vs. day 1 (B). Dotted lines represent point-wise lower and upper limits for 95% confidence interval for coefficient functions.

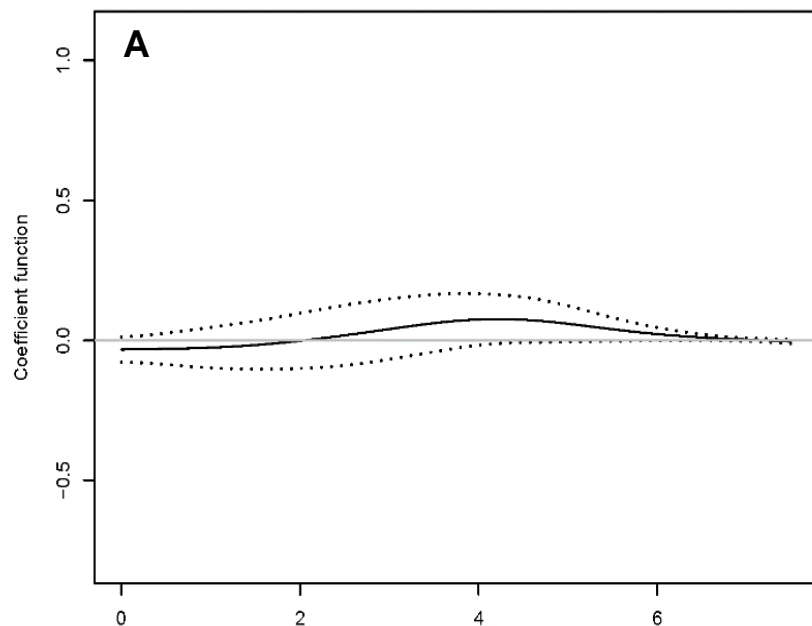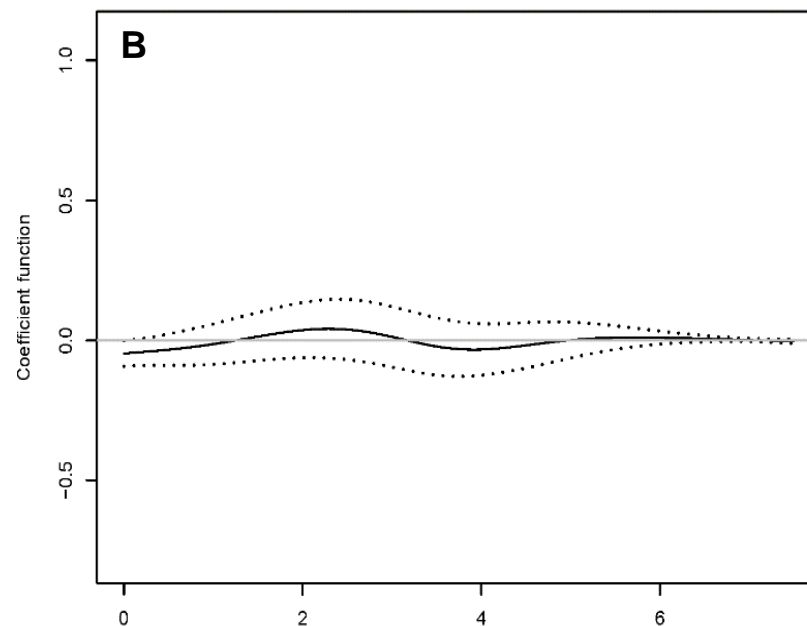

Supplement: Supplementary file [file 13891730]
